# Supplementary material for: DNA metabarcoding of littoral hard-bottom communities: high diversity and database gaps revealed by two molecular markers
Source: PeerJ journal article supplement (doi:10.7717/peerj.4705), 2018-05-04

**18S**

**ecological replicates**

**COI**

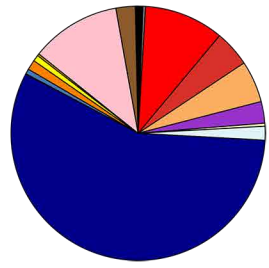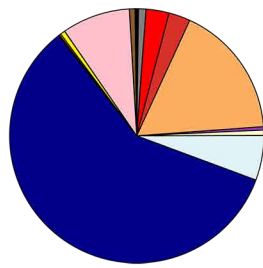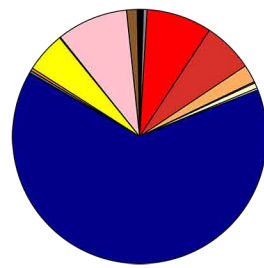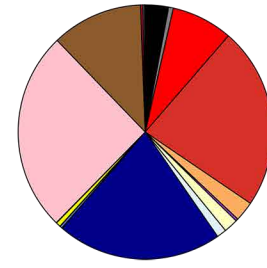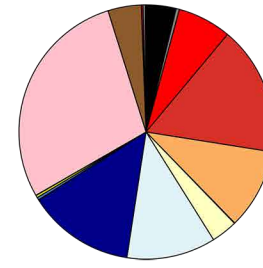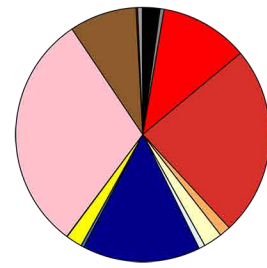

**extraction replicates**

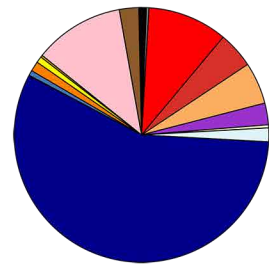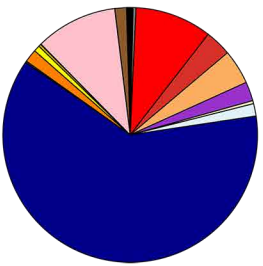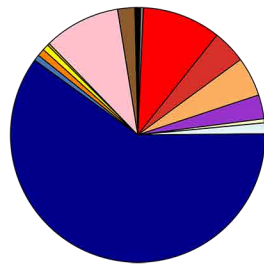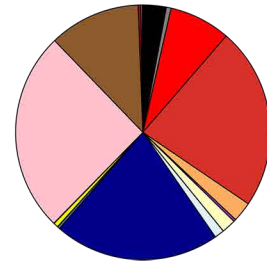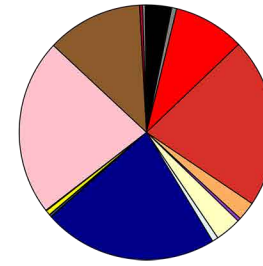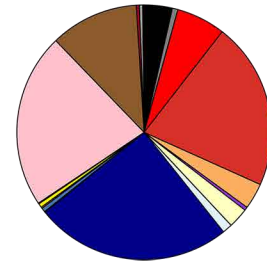

**PCR replicates**

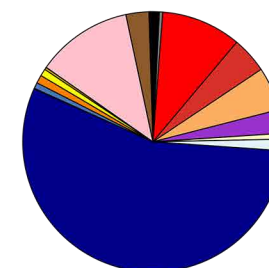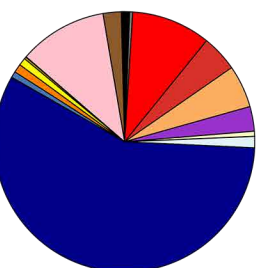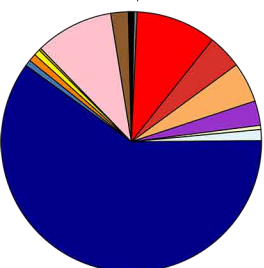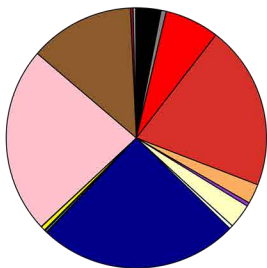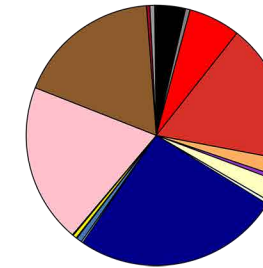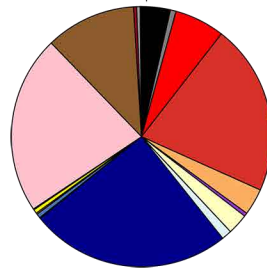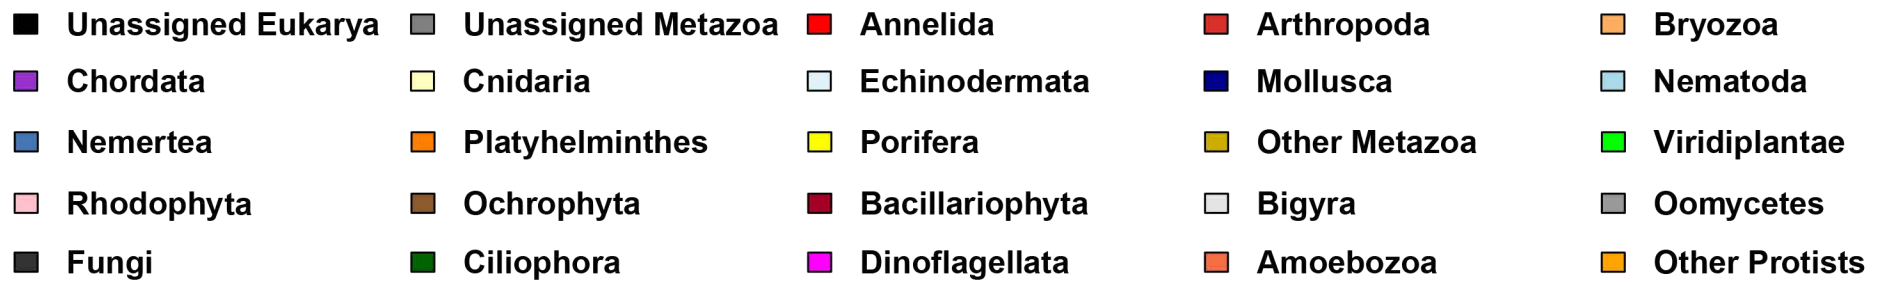

Supplement: Fig_S6_replicability.pdf [file Fig_S6_replicability.pdf]
