# Supplementary material for: DNA metabarcoding of littoral hard-bottom communities: high diversity and database gaps revealed by two molecular markers
Source: PeerJ journal article supplement (doi:10.7717/peerj.4705), 2018-05-04

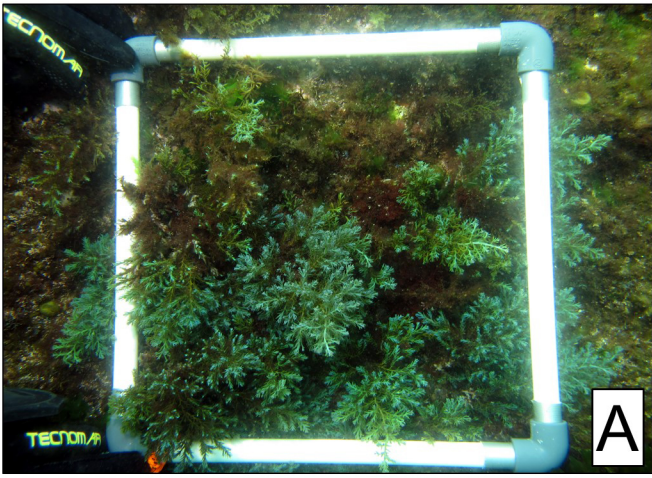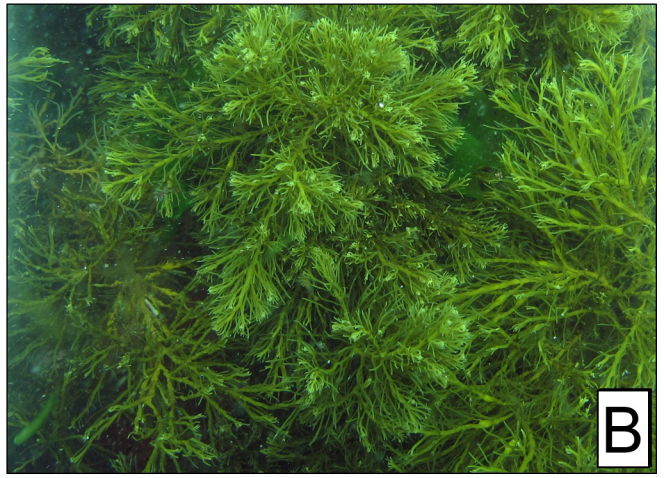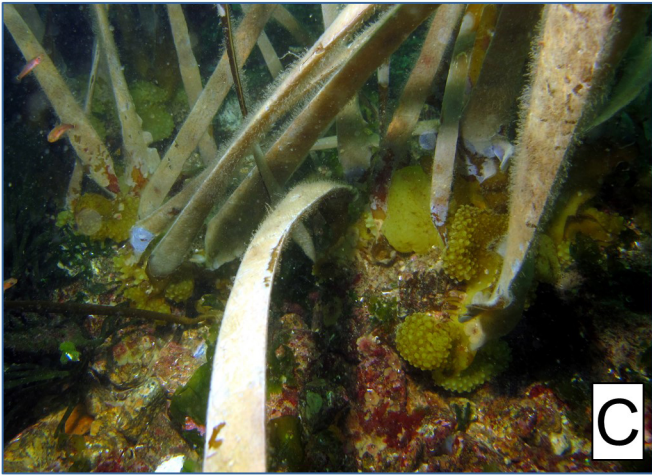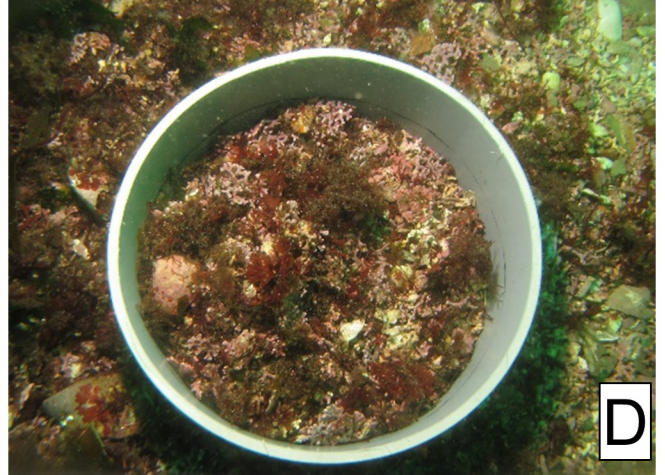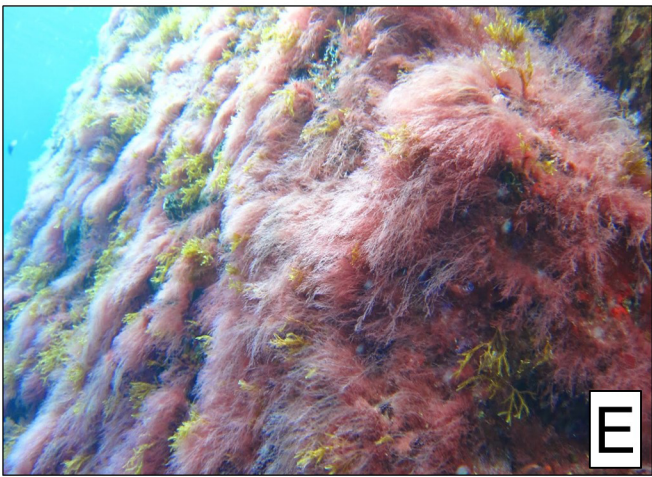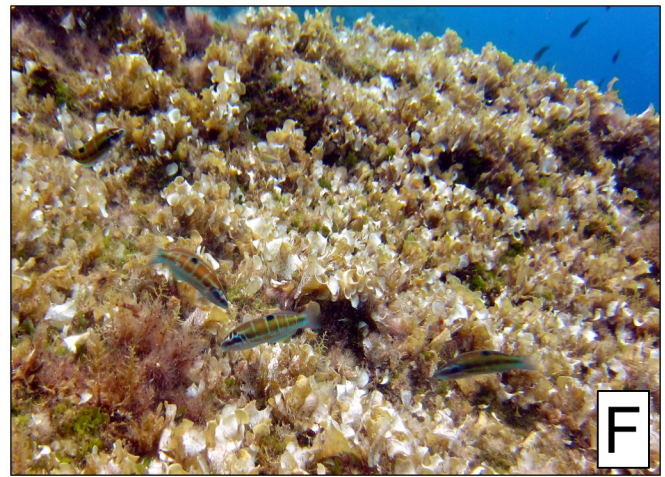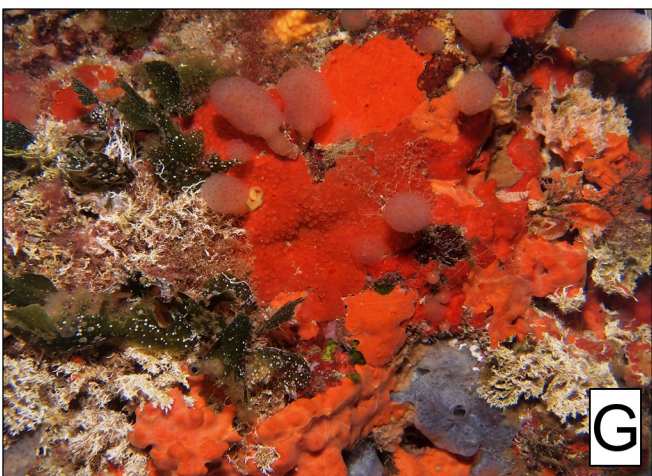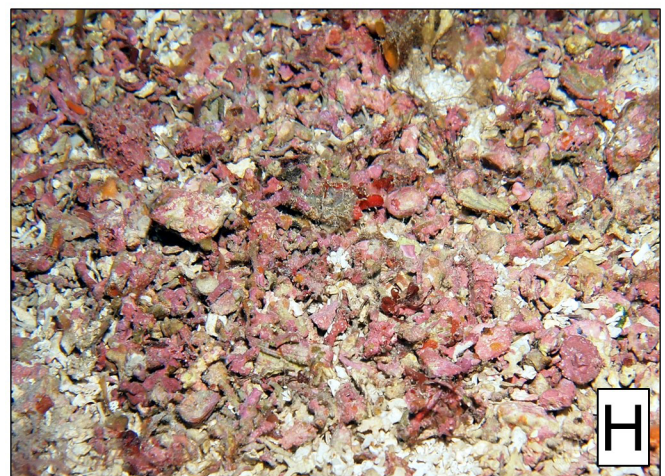

Supplement: Fig_S2_Sampled_communities.pdf [file Fig_S2_Sampled_communities.pdf]
