# Supplementary material for: DNA metabarcoding of littoral hard-bottom communities: high diversity and database gaps revealed by two molecular markers
Source: PeerJ journal article supplement (doi:10.7717/peerj.4705), 2018-05-04
Supplement: Table_S1_Taxonomic_summary_of_reference_databases.pdf [file Table_S1_Taxonomic_summary_of_reference_databases.pdf]

**Table S1.** Summary of reference sequences included in the databases used for taxonomic assignment of COI and 18S using ecotag.

| <b>Taxonomic group</b>      | <b>Number of reference sequences in db_COI_MBPK database</b> | <b>Number of reference sequences in db_18S_r117 database</b> |
|-----------------------------|--------------------------------------------------------------|--------------------------------------------------------------|
| Prokaryota                  | 45                                                           | 2                                                            |
| Amoebozoa                   | 16                                                           | 462                                                          |
| Apicomplexa                 | 166                                                          | 628                                                          |
| Apusozoa                    | 0                                                            | 22                                                           |
| Centroheliozoa              | 0                                                            | 36                                                           |
| Ciliophora                  | 99                                                           | 904                                                          |
| Cryptophyta                 | 5                                                            | 178                                                          |
| Dinoflagellata              | 603                                                          | 423                                                          |
| Excavata Euglenozoa         | 6                                                            | 475                                                          |
| Excavata Other              | 11                                                           | 149                                                          |
| Fungi Ascomycota            | 156                                                          | 1200                                                         |
| Fungi Basidiomycota         | 25                                                           | 584                                                          |
| Fungi Blastocladiomycota    | 2                                                            | 29                                                           |
| Fungi Chytridiomycota       | 4                                                            | 62                                                           |
| Fungi Cryptomycota          | 0                                                            | 1                                                            |
| Fungi Entomophthoromycota   | 0                                                            | 48                                                           |
| Fungi Entorrhizomycota      | 0                                                            | 4                                                            |
| Fungi Glomeromycota         | 1                                                            | 122                                                          |
| Fungi Microsporidia         | 0                                                            | 60                                                           |
| Fungi Neocallimastigomycota | 0                                                            | 11                                                           |
| Fungi Zygomycota            | 5                                                            | 195                                                          |
| Glaucophyta                 | 6                                                            | 4                                                            |
| Haptophyta                  | 9                                                            | 94                                                           |
| Metazoa Acanthocephala      | 95                                                           | 59                                                           |
| Metazoa Annelida            | 7269                                                         | 1018                                                         |
| Metazoa Arthropoda          | 108843                                                       | 8275                                                         |
| Metazoa Brachiopoda         | 44                                                           | 34                                                           |
| Metazoa Bryozoa             | 158                                                          | 137                                                          |
| Metazoa Chaetognatha        | 44                                                           | 20                                                           |
| Metazoa Chordata            | 40037                                                        | 339                                                          |
| Metazoa Cnidaria            | 1118                                                         | 671                                                          |
| Metazoa Ctenophora          | 1                                                            | 12                                                           |
| Metazoa Echinodermata       | 4771                                                         | 66                                                           |
| Metazoa Entoprocta          | 3                                                            | 17                                                           |
| Metazoa Gastrotricha        | 52                                                           | 95                                                           |
| Metazoa Gnathostomulida     | 2                                                            | 24                                                           |
| Metazoa Hemichordata        | 4                                                            | 17                                                           |
| Metazoa Kinorhyncha         | 0                                                            | 23                                                           |
| Metazoa Loricifera          | 0                                                            | 2                                                            |
| Metazoa Mollusca            | 15032                                                        | 858                                                          |
| Metazoa Myzostomida         | 1                                                            | 0                                                            |
| Metazoa Nematoda            | 1507                                                         | 1547                                                         |
| Metazoa Nematomorpha        | 0                                                            | 13                                                           |
| Metazoa Nemertea            | 160                                                          | 79                                                           |
| Metazoa Onychophora         | 363                                                          | 38                                                           |
| Metazoa Platyhelminthes     | 1439                                                         | 1259                                                         |
| Metazoa Porifera            | 397                                                          | 244                                                          |
| Metazoa Priapulida          | 4                                                            | 5                                                            |
| Metazoa Rhombozoa           | 14                                                           | 4                                                            |
| Metazoa Rotifera            | 761                                                          | 34                                                           |
| Metazoa Tardigrada          | 229                                                          | 109                                                          |
| Metazoa Xenacoelomorpha     | 60                                                           | 134                                                          |
| Opisthokonta Choanozoa      | 0                                                            | 52                                                           |
| Perkinsozoa                 | 0                                                            | 8                                                            |

|                                 |               |              |
|---------------------------------|---------------|--------------|
| Rhizaria Cercozoa               | 2             | 193          |
| Rhizaria Foraminifera           | 0             | 948          |
| Rhizaria Polycystinea           | 0             | 84           |
| Rhizaria Other                  | 0             | 2            |
| Rhodophyta                      | 4723          | 688          |
| Stramenopiles Bacillariophyta   | 68            | 584          |
| Stramenopiles Chrysophyceae     | 7             | 72           |
| Stramenopiles Bigyra            | 2             | 101          |
| Stramenopiles Eustigmatophyceae | 8             | 25           |
| Stramenopiles Oomycetes         | 235           | 70           |
| Stramenopiles Phaeophyceae      | 170           | 65           |
| Stramenopiles Raphidophyceae    | 26            | 5            |
| Stramenopiles Synurophyceae     | 2             | 45           |
| Stramenopiles Xanthophyceae     | 8             | 30           |
| Stramenopiles Other             | 0             | 22           |
| Viridiplantae Chlorophyta       | 28            | 717          |
| Viridiplantae Streptophyta      | 128           | 1588         |
| <b>TOTAL</b>                    | <b>188929</b> | <b>26125</b> |
